## Response and remediation actions following the detection of *Naegleria fowleri* in two treated drinking water distribution systems, Louisiana, 2013–2014

Jennifer R. Cope, Amy M. Kahler, Jake Causey, John G. Williams, Jennifer Kihlken, Caryn Benjamin, Amanda P. Ames, Johan Forsman, Yuanda Zhu, Jonathan S. Yoder, Chad J. Seidel and Vincent R. Hill

### ABSTRACT

*Naegleria fowleri* causes the usually fatal disease primary amebic meningoencephalitis (PAM), typically in people who have been swimming in warm, untreated freshwater. Recently, some cases in the United States were associated with exposure to treated drinking water. In 2013, a case of PAM was reported for the first time in association with the exposure to water from a US treated drinking water system colonized with culturable *N. fowleri*. This system and another were found to have multiple areas with undetectable disinfectant residual levels. In response, the water distribution systems were temporarily converted from chloramine disinfection to chlorine to inactivate *N. fowleri* and reduced biofilm in the distribution systems. Once > 1.0 mg/L free chlorine residual was attained in all systems for 60 days, water testing was performed; *N. fowleri* was not detected in water samples after the chlorine conversion. This investigation highlights the importance of maintaining adequate residual disinfectant levels in drinking water distribution systems. Water distribution system managers should be knowledgeable about the ecology of their systems, understand potential water quality changes when water temperatures increase, and work to eliminate areas in which biofilm growth may be problematic and affect water quality.

**Key words** | drinking water, *Naegleria fowleri*, primary amebic meningoencephalitis, water distribution systems

Jennifer R. Cope (corresponding author)

Amy M. Kahler

Jonathan S. Yoder

Vincent R. Hill

Waterborne Disease Prevention Branch, Division of Foodborne, Waterborne, and Environmental Diseases, National Center for Emerging and Zoonotic Infections Diseases, Centers for Disease Control and Prevention, 1600 Clifton Rd NE, Atlanta, GA 30329, USA  
E-mail: [jcope@cdc.gov](mailto:jcope@cdc.gov)

Jake Causey

Chad J. Seidel

Corona Environmental Consulting, 1001 Hingham St, Suite 102, Rockland, MA 02370, USA

John G. Williams

Jennifer Kihlken

Caryn Benjamin

Amanda P. Ames

Johan Forsman

Yuanda Zhu

Louisiana Department of Health, 628 North 4th St, Baton Rouge, LA 70802, USA

### INTRODUCTION

*Naegleria fowleri*, a thermophilic free-living amoeba found naturally in warm freshwater environments, such as lakes, ponds, and rivers, causes the disease primary amebic meningoencephalitis (PAM). PAM has a reported mortality of 97% in the United States and occurs when water containing the amoeba goes up the nose, crosses the cribriform plate, and enters the brain (Cope & Ali 2016). Surveillance for this infection in the United States has demonstrated that most cases are associated with exposure to warm, untreated freshwater while participating in recreational water activities such as swimming or diving (Yoder *et al.* 2010).

Recent events and research have shown *N. fowleri* to be an opportunistic pathogen living in the biofilms of drinking water distribution systems (Puzon *et al.* 2009). Long before the first cases of PAM associated with drinking water exposure were identified in the United States, PAM cases with drinking water exposures were reported from regions in Australia in the 1970s and early 1980s (Dorsch *et al.* 1983). There, drinking water, distributed in overland pipes for hundreds of kilometers, possessed no detectable residual disinfectant by the time it reached the home taps. The successful Australian response to these PAM cases was to

implement an ameba monitoring program and boost disinfectant residual levels, which for some systems, required switching to chloramination to maintain disinfectant residual levels over long distances (Robinson & Christy 1984).

The first cases of PAM in the United States associated with nasal exposure to drinking water were identified in Arizona in 2002 in two children exposed to water from an untreated geothermal well (Marciano-Cabral *et al.* 2003). More recently, in 2011, the first cases of PAM associated with treated drinking water were identified in two residents of Louisiana who used neti pots containing tap water for sinus irrigation (Yoder *et al.* 2012). Environmental investigations of the 2011 Louisiana PAM cases included water sampling within the case-patient homes and limited sampling of water from the associated distribution systems; *N. fowleri* was detected only in the homes. In 2013, a case of PAM was reported for the first time in association with exposure to water from a US treated drinking water system colonized with culturable *N. fowleri* (Cope *et al.* 2015). The case occurred in a 4-year-old child who had played on a lawn water slide supplied with water from two garden hoses connected to the home's outdoor faucet. The home was located in St. Bernard Parish, Louisiana, where one of the neti pot PAM cases occurred in 2011. This finding prompted an environmental investigation of the home and parish water distribution system that ultimately found *N. fowleri* in the water distribution system along with multiple areas of undetectable disinfectant residual (Cope *et al.* 2015). Here, we describe the response and remediation following the detection of *N. fowleri* in the St. Bernard Parish water distribution system. This response also included a follow-up investigation in DeSoto Parish, where the second 2011 neti pot case-patient resided.

## MATERIALS AND METHODS

### DeSoto Parish environmental investigation

After culturable *N. fowleri* was found in water samples collected from the St. Bernard Parish drinking water distribution system in September 2013 (Cope *et al.* 2015), health officials conducted an investigation of the DeSoto Parish drinking water system, as both systems were associated with

PAM cases in 2011. The DeSoto Parish environmental investigation conducted in September 2013 entailed collection of 10 large-volume ultrafiltration (UF) samples, one water and one sediment sample from a water storage tower serving the 2011 case-patient residence, and the water meter serving the case-patient residence (Figure 1). Field water quality testing was performed in conjunction with water sample collection. Methods used to test these samples, and additional samples collected from the St. Bernard Parish water system, are described in subsequent sections. Based on the results of the investigation in DeSoto Parish (Table 1), as well as the findings in St. Bernard, health officials decided to perform a chlorine conversion in DeSoto and St. Bernard Parishes.

### Chlorine conversions in St. Bernard and DeSoto Parish systems

During the St. Bernard Parish case investigation, monochloramine residual, as indicated by measuring total chlorine concentrations, was not detected in three of four distribution system samples from which *N. fowleri* was cultured (Cope *et al.* 2015). The St. Bernard and DeSoto Parish water utilities used chloramination to maintain a disinfectant residual in their distribution systems, so water utility and health officials determined that a temporary chlorine conversion was appropriate to inactivate *N. fowleri* and reduce biofilm in the distribution systems. Health officials estimated that a free chlorine level of 1.0 mg/L maintained at all points in the distribution systems and a free chlorine level of 2.0 mg/L maintained in all storage tanks for at least 60 days should inhibit the growth of *N. fowleri*. After notifying the public about the planned chlorine conversion, each water system shut off the ammonia feed and increased the free chlorine feed to initiate the chlorine conversion process. Free chlorine level measurements were conducted weekly at 60–120 sites in each of the systems to monitor the progress of the chlorine conversion. The sites monitored for chlorine level were selected to be geographically representative taking into consideration population densities and areas with persistently relatively low residual readings (based on historical water quality data from the systems). The 60-day time period started when all sites in each distribution system achieved at least a 1.0 mg/L free chlorine residual. If any site tested fell

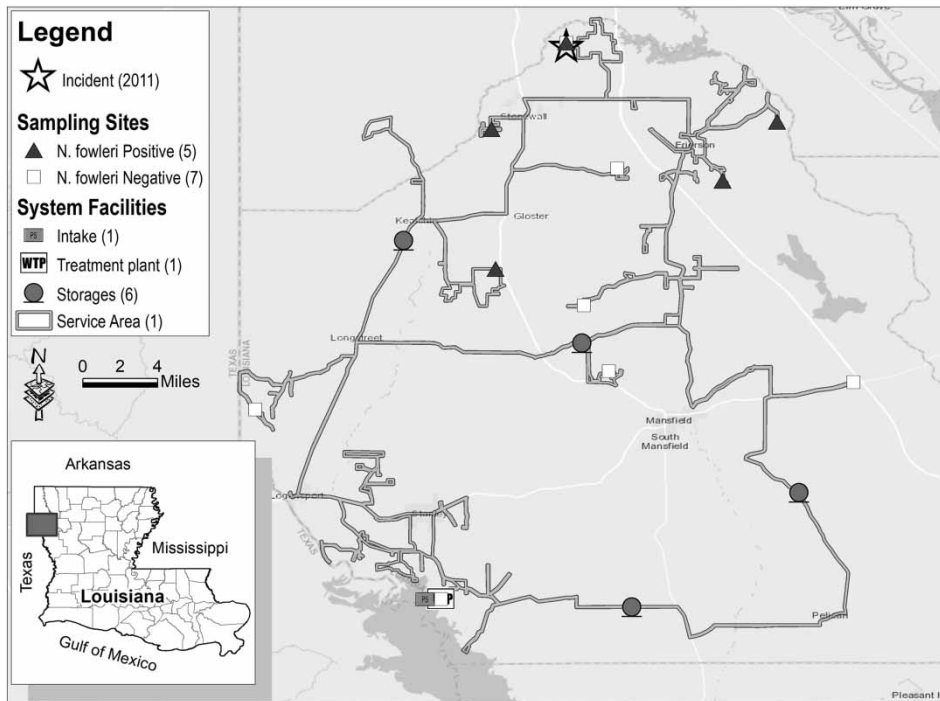

**Figure 1** | Map of DeSoto Parish distribution system with locations of sampling sites and PAM case residence.

**Table 1** | Measured water quality parameters, volume collected for *N. fowleri* testing, and *N. fowleri* detections for water samples collected from DeSoto parish system before chlorine conversion, September 2013

| Site ID | Location                       | Total chlorine (mg/L) | Temperature (°C) | Volume collected (L) | <i>N. fowleri</i> culture |
|---------|--------------------------------|-----------------------|------------------|----------------------|---------------------------|
| D1      | Point of collection sample tap | 0.10                  | 29               | 737                  | +                         |
| D2      | Flush hydrant                  | 0.05                  | 28               | 775                  | +                         |
| D3      | Flush hydrant                  | 0.05                  | 30               | 641                  | +                         |
| D4      | Flush hydrant                  | 0.08                  | 34               | 231                  | +                         |
| D5      | Point of collection sample tap | 0.40                  | 26               | 246                  | –                         |
| D6      | Fire hydrant                   | 0.20                  | 26               | 206                  | –                         |
| D7      | Fire hydrant                   | 0.44                  | 32               | 418                  | +                         |
| D8      | Flush hydrant                  | 0.15                  | 31               | 598                  | +                         |
| D9      | Point of collection sample tap | 0.10                  | 23               | 105                  | –                         |
| D10     | Fire hydrant                   | 0.09                  | 30               | 565                  | –                         |

below 1.0 mg/L, then the 60-day clock was paused until all sites tested were  $\geq 1.0$  mg/L.

### Sample collection

Before chlorine conversion, distribution system water and water meter samples were collected from the DeSoto

Parish system in September 2013 and water and sediment were collected from a storage tank in December 2013. After the chlorine conversions were completed, sampling of finished and source water began in both DeSoto and St. Bernard Parish systems (Figures 1 and 2). Water samples were collected in the months of January, May, and September 2014 for both systems. Sample sites included service

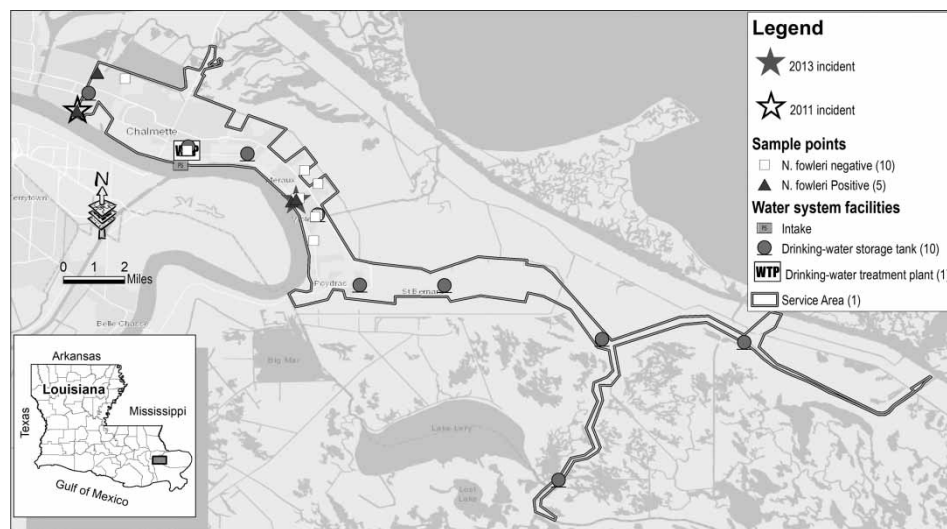

**Figure 2** | Map of St. Bernard Parish distribution system with locations of sampling sites and PAM case residences.

lines, flush or fire hydrants, or other collection points in the distribution system.

Before sample collection, each faucet was purged for 3 min to flush out stagnant water. A 1-L grab sample for *N. fowleri* analysis and a 100-mL grab sample for heterotrophic plate count (HPC, Standard Method 9215D (APHA 2005)) analysis were collected in bottles containing sodium thiosulfate to immediately quench the chlorine residual in a finished water sample (1% w/v ratio). In addition to a grab sample, a large-volume sample was collected by dead-end ultrafiltration (DEUF) (Smith & Hill 2009; Mull & Hill 2012) for *N. fowleri* analysis. Between 84 and 776 L were collected at each site by DEUF, depending on time available and logistical constraints at the sampling locations. The chlorine residual of the water retained in the ultrafilter was immediately quenched by pushing a 1% (w/v) sodium thiosulfate solution through the ultrafilter. Chlorine residual, temperature, pH, turbidity, and conductivity were measured in the field. Free and total chlorine residuals were measured using USEPA-approved DPD reagents and HACH Pocket Colorimeter II instrument. Turbidity was measured using a HACH 2100P portable turbidimeter. Temperature, pH, and conductivity were measured using a HACH HQ40d Portable Meter multi-parameter probe.

During storage and transport, samples for ameba testing were maintained at ambient temperature and the HPC

sample was kept chilled. Samples were shipped overnight to the Centers for Disease Control and Prevention (CDC) in Atlanta, GA for processing and analysis the following morning.

### *Naegleria fowleri* detection

#### Ultrafilters

Ultrafilters were backflushed using a CDC protocol and a backflush solution of WB saline containing 0.1% Tween 80 (Visvesvara & Balamuth 1975; Smith & Hill 2009). The recovered backflush solution was centrifuged at  $1,500 \times g$  for 15 min at 25 °C and the pelleted concentrate (5–27 mL, median 9 mL) was split three ways: a 750- $\mu$ L aliquot directly to culture, a 750- $\mu$ L aliquot extracted for molecular analysis, and the remaining volume subjected to immunomagnetic separation (IMS) (Mull *et al.* 2013). Following IMS, the resultant sample was split two ways: a 750- $\mu$ L aliquot directly to culture, and a 750- $\mu$ L aliquot extracted for molecular analysis.

A stock solution of *Escherichia coli* ATCC 11775 was produced by streaking TSA agar plates and incubating overnight at 37 °C. Plates were flooded with 5–10 mL WB saline and the growth was scraped from each plate using a cell spreader. The suspension was stored in a conical tube at 4 °C. Before the *Naegleria* culture procedure, 100 mL of

the *E. coli* suspension was spread onto non-nutrient agar (NNA) plates and allowed to absorb in a biosafety cabinet. To the prepared plates, 750  $\mu$ L of the pre- and post-IMS samples were pipetted directly into the center of the plates and allowed to absorb with minimal agitation to prevent spreading of the inoculum. Plates were incubated at 42 °C and examined for the presence of thermophilic ameba trophozoites or cysts for up to 7 days using a standard light microscope at 100 and 200 $\times$  total magnification. When trophozoites or cysts were observed, the amebas were harvested in 2 mL WB saline by gently scraping the surface of the agar with a cell scraper. If no amebic forms were observed within 7 days, the entire plate was harvested in 2 mL WB saline. A 750- $\mu$ L aliquot was extracted for molecular analysis. Nucleic acid was extracted from samples using a universal extraction procedure for environmental samples (Hill et al. 2015) and *N. fowleri* was detected using a species-specific real-time polymerase chain reaction (PCR) assay (Mull et al. 2013). A direct (pre-culture) sample was considered positive when duplicate real-time PCR crossing threshold values were  $\leq 42$ . Confirmation of pre-culture PCR-positive samples was performed by Sanger sequencing using a pair of primers designed to amplify sequences of the 5.8S/ITS rRNA gene. The forward (JNF, GAGATGAACCTGGCGGACC, 1741–1759) and reverse (JNR, GGGGTACCCTCTCACATTAGA, 2208–2188) primers were designed to amplify ~468 bp and positions in parenthesis were based on the sequence of *Naegleria fowleri* (GenBank accession no. KT375442). PCR was performed using TaqMan Environmental Master Mix 2.0 (Life Technologies, Grand Island, NY) containing 5  $\mu$ L of DNA and 0.25  $\mu$ M of each primer in a 20  $\mu$ L reaction volume. The PCR amplification conditions were: denaturation at 95 °C for 10 min followed by 50 cycles of 95 °C for 15 s and 63 °C for 45 s. The amplified product was submitted to GeneWiz (South Plainfield, NJ) for Sanger sequencing using the forward primer and the resultant sequences were further trimmed to remove low-quality regions at 5' and 3' nucleotides to obtain ~380 bp. Trimmed sequence data were analyzed using a BLAST search (<https://blast.ncbi.nlm.nih.gov/Blast.cgi>) as *N. fowleri*.

A culture sample was considered positive if amebas were observed on the culture plate and confirmed by duplicate real-time PCR detections.

### Grab samples

Two milliliters of an *E. coli* ATCC 11775 suspension was added to the 1-L grab sample and the entire volume was centrifuged at 1,500  $\times g$  for 15 min at 25 °C. The resulting pellet was brought to 2 mL with WB saline and 1-mL each was inoculated onto two prepared NNA plates using the culture methods described for ultrafilter samples. One plate each was incubated at 42 and 44 °C and examined for the presence of thermophilic ameba trophozoites or cysts for up to 7 days. However, only samples that showed evidence of thermophilic ameba growth were harvested for PCR confirmation of *N. fowleri*.

### Statistical analyses

Linear regression was performed to evaluate associations between measured physical water quality parameters (temperature, turbidity, conductivity) and HPC. Regression models were stratified by the system, included data from all sampling months, and treated each sample independently. Separate models were developed for each water quality parameter. A two-tailed paired *t*-test was conducted to compare the average total chlorine residuals in the St. Bernard Parish system in May versus September. Statistical analyses were performed in Excel, and *P*-values  $\leq 0.5$  were considered statistically significant.

## RESULTS

### Initial investigation of DeSoto Parish water system

Before chlorine conversion, total chlorine residuals in the DeSoto Parish system samples ranged from 0.05 to 0.44 mg/L (Table 1). *N. fowleri* was detected by culture in 6 of 10 distribution system water samples collected from the DeSoto Parish system. *N. fowleri* was not detected in the 1.1-L water sample or the sediment sample collected from the water storage tank or in biofilm material recovered from the water meter serving the 2011 PAM case-patient's home (data not shown).

### Chlorine conversions

Before the chlorine conversion in the St. Bernard Parish system, total chlorine residuals were low and 5 of the 10



distribution samples tested had total chlorine residuals below the detectable level of 0.02 mg/L (Cope *et al.* 2015). In the St. Bernard system, it took 10 weeks to start the 60-day clock (conversion started 5 September 2013) and 17 weeks to complete the 60-day conversion (14 November 2013 through 22 January 2014) (Figure 3). For DeSoto, it took 3.5 weeks to start the 60-day clock (conversion started 8 October 2013) and 10 weeks to complete the 60-day conversion (30 October 2013 through 29 December 2013) (Figure 4). Both systems had to perform extensive unidirectional flushing to achieve the 1.0 mg/L level in certain areas, including areas with old cast iron pipe. St. Bernard cleaned storage tanks and reactivated a booster chlorination system at a downstream water storage facility to achieve the 1.0 mg/L level at the end of the system. DeSoto used a mobile booster chlorination system that was moved to specific areas to achieve the 1.0 mg/L level faster throughout the system.

### Distribution system investigations after completion of chlorine conversions

After the chlorine conversions were completed, free chlorine residuals ranged from 1.0 to 5.1 mg/L in the St. Bernard system (Table 2) and 1.3–6.5 mg/L in the

DeSoto system (Table 3) and over time, a decrease in disinfectant residual was observed. In St. Bernard, the total chlorine residuals throughout the distribution system were significantly lower in September than in May ( $P = 0.01$ ). Statistical analyses could not be performed for DeSoto due to the switch from measuring free chlorine in January and May to total chlorine in September, but total chlorine residuals in September were generally lower than the free chlorine residuals measured in January.

In the St. Bernard Parish system, the pH ranged from 7.1 to 7.6 (median 7.3) from January to September (data not shown). Turbidity ranged from 0.06 to 38 NTU (median 0.23 NTU) and conductivity ranged from 310 to 500  $\mu\text{S}/\text{cm}$  (median 380  $\mu\text{S}/\text{cm}$ ). Temperature increased from January to September, with a median January temperature of 15 °C and a median September temperature of 29 °C. In the DeSoto parish system, the pH ranged from 6.1 to 7.5 (median 6.9) from January to September. Turbidity ranged from 0.27 to 16 NTU (median 1.1 NTU) and conductivity ranged from 260 to 440  $\mu\text{S}/\text{cm}$  (median 330  $\mu\text{S}/\text{cm}$ ). Water temperature increased from January to September with a median January temperature of 11 °C and a median September temperature of 26 °C.

There were no significant associations between HPC and measured turbidity or conductivity in either system.

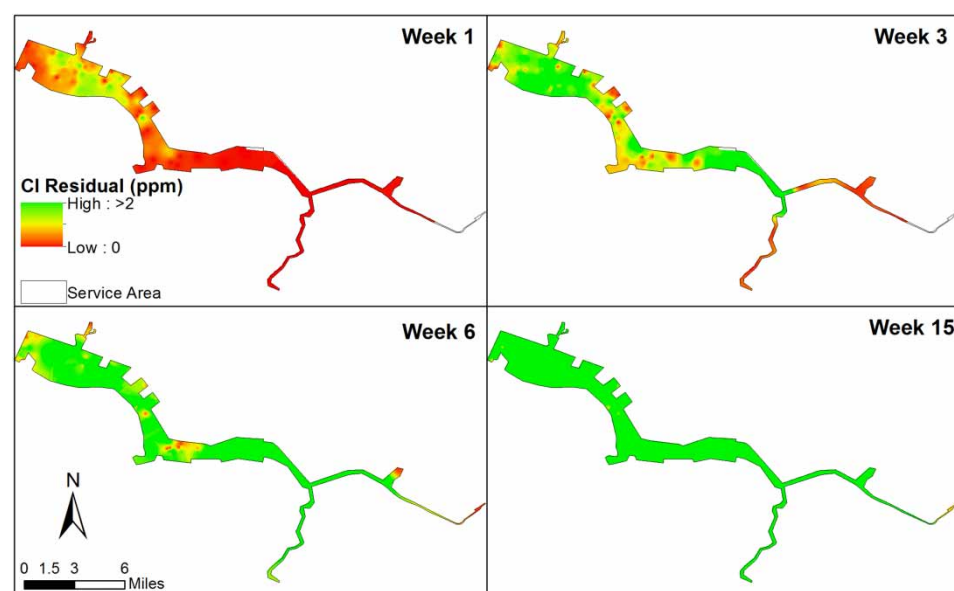

Figure 3 | Progression of chlorine conversion, St. Bernard Parish, 2013–2014.

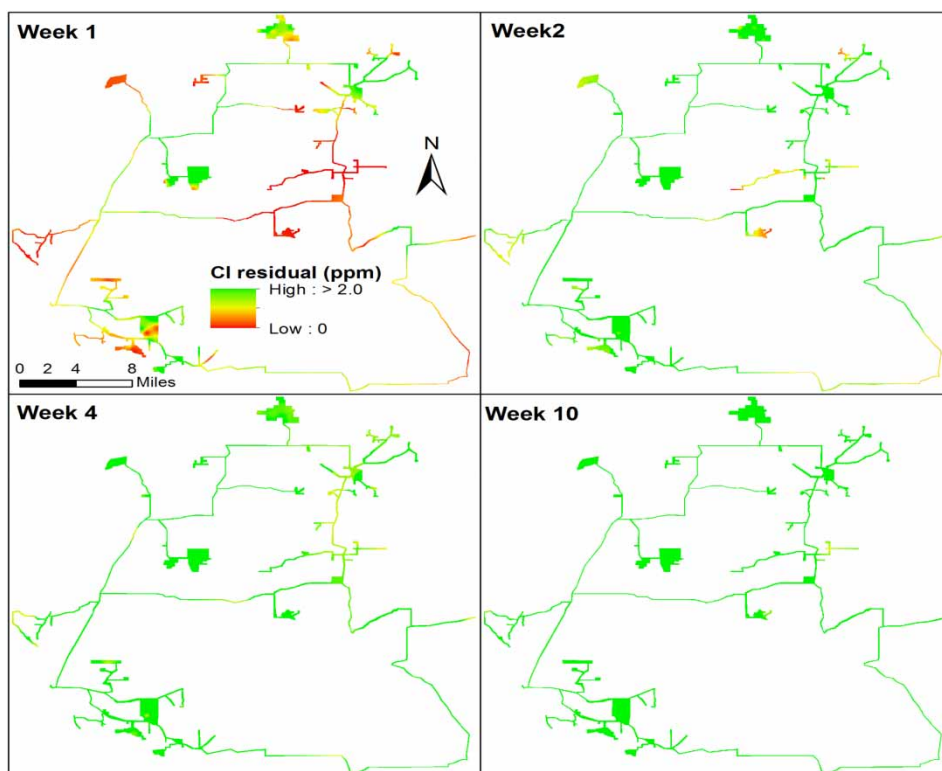

**Figure 4** | Progression of chlorine conversion, DeSoto Parish, 2013.

However, increasing water temperatures throughout the year were associated with increased HPC concentrations in both parishes. In St. Bernard, every 10 °C increase in temperature was associated with a 2.5 log<sub>10</sub> increase in HPC concentration ( $\beta = 0.25$ ,  $P < 0.0001$ ). In DeSoto, every 10 °C increase in temperature was associated with a 2.0 log<sub>10</sub> increase in HPC concentration ( $\beta = 0.20$ ,  $P < 0.0001$ ).

No culturable thermophilic amebas were detected in any sample collected in January or May. In September, *N. fowleri* was detected by pre-culture PCR in the large-volume ultrafilter samples from sites B10 and B11 in St. Bernard Parish (Table 3). For both sites, the IMS-treated aliquots and non-IMS-treated aliquots both tested positive. The presence of *N. fowleri* in these samples was confirmed by Sanger sequencing. Sequences were deposited to GenBank under accession numbers MN166032 and MN166031 for samples B10 and B11, respectively.

Thermophilic amebae were cultured from the site B10 sample, but not from site B11. However, these thermophilic amebae tested negative for *N. fowleri* by PCR. Thermophilic

amebae were detected by culture in the large-volume ultrafilter sample from site B9 in St Bernard parish in September but tested negative for *N. fowleri* by PCR.

## DISCUSSION

Following the chlorine conversion, disinfectant residuals in both the St. Bernard and DeSoto distributions systems met or exceeded the 1 mg/L free chlorine target. *N. fowleri* is susceptible to inactivation by chlorine and consequently no *N. fowleri* was detected in either system immediately after the chlorine conversion (Miller et al. 2015). As the year progressed, conditions in the St. Bernard distribution system became favorable to *N. fowleri* growth and persistence. Water temperatures within the distribution system increased, and as a thermophilic organism, *N. fowleri* thrives in warm temperatures (De Jonckheere 2002). Maintaining the disinfectant residual throughout the distribution system was difficult, as evidenced by a decrease in

**Table 2** | Measured water quality parameters, heterotrophic plate count (HPC), and *N. fowleri* detections for St. Bernard parish water samples collected after chlorine conversion, January–September 2014

| Site ID | Location                           | Month     | Temp. (°C) | Free chlorine (mg/L) | Total chlorine (mg/L) | HPC (CFU/ mL)         | Volume collected (L) | <i>N. fowleri</i> culture |
|---------|------------------------------------|-----------|------------|----------------------|-----------------------|-----------------------|----------------------|---------------------------|
| B1      | Service line hose bib              | January   | 13         | 3.8                  |                       | $<1.0 \times 10^{-2}$ | 368                  | –                         |
|         |                                    | May       | 26         |                      | 0.7                   | $>2.0 \times 10^2$    | 160                  | –                         |
|         |                                    | September | 29         |                      | 2.2                   | $4.0 \times 10^2$     | 159                  | –                         |
| B2      | Main line                          | January   | 13         | 4.3                  |                       | $5.0 \times 10$       | 317                  | –                         |
|         |                                    | May       | 22         |                      | 3.0                   | $1.5 \times 10^2$     | 149                  | –                         |
|         |                                    | September | 30         |                      | 0.4                   | $5.0 \times 10^2$     | 148                  | –                         |
| B3      | Main line                          | January   | 13         | 4.2                  |                       | $<1.0 \times 10^{-2}$ | 235                  | –                         |
|         |                                    | May       | 22         |                      | 3.2                   | $2.7 \times 10^1$     | 117                  | –                         |
|         |                                    | September | 28         |                      | 1.1                   | $1.8 \times 10^2$     | 125                  | –                         |
| B4      | Main line                          | January   | 15         | 2.2                  |                       | $1.5 \times 10^1$     | 84.4                 | –                         |
|         |                                    | May       | 23         |                      | 3.1                   | $7.6 \times 10$       | 155                  | –                         |
|         |                                    | September | 29         |                      | 2.4                   | $7.0 \times 10^1$     | 138                  | –                         |
| B5      | Fire hydrant                       | January   | 13         | 4.8                  |                       | $<1.0 \times 10^{-2}$ | 135                  | –                         |
|         |                                    | May       | 22         |                      | 3.0                   | $9.8 \times 10$       | 235                  | –                         |
|         |                                    | September | 29         |                      | 2.3                   | $1.1 \times 10^2$     | 236                  | –                         |
| B6      | Fire hydrant                       | January   | 16         | 1.1                  |                       | $<1.0 \times 10^{-2}$ | 137                  | –                         |
|         |                                    | May       | 25         |                      | 1.4                   | $>2.0 \times 10^2$    | 202                  | –                         |
|         |                                    | September | 30         |                      | 0.7                   | $6.0 \times 10^2$     | 201                  | –                         |
| B7      | Service line                       | January   | 15         | 3.3                  |                       | $<1.0 \times 10^{-2}$ | 158                  | –                         |
|         |                                    | May       | 22         |                      | 3.0                   | $7.0 \times 10^1$     | 511                  | –                         |
|         |                                    | September | 30         |                      | 0.5                   | $>2.0 \times 10^3$    | 511                  | –                         |
| B8      | Service line                       | January   | 14         | 2.4                  |                       | $<1.0 \times 10^{-2}$ | 102                  | –                         |
|         |                                    | May       | 23         |                      | 3.1                   | $2.2 \times 10^1$     | 341                  | –                         |
|         |                                    | September | 29         |                      | 1.5                   | $3.3 \times 10^2$     | 341                  | –                         |
| B9      | Service line                       | January   | 16         | 5.1                  |                       | $3.0 \times 10^1$     | 327                  | –                         |
|         |                                    | May       | 23         |                      | 2.7                   | $>2.0 \times 10^2$    | 416                  | –                         |
|         |                                    | September | 30         |                      | 0.1                   | $1.6 \times 10^3$     | 450                  | – <sup>a</sup>            |
| B10     | Service line                       | January   | 16         | 1.0                  |                       | $3.5 \times 10^1$     | 131                  | –                         |
|         |                                    | May       | 25         |                      | 1.6                   | $6.0 \times 10^{-1}$  | 350                  | –                         |
|         |                                    | September | 29         |                      | 0.4                   | $1.8 \times 10^3$     | 356                  | – <sup>b</sup>            |
| B11     | Service line                       | January   | 16         | 1.3                  |                       | $<1.0 \times 10^{-2}$ | 131                  | –                         |
|         |                                    | May       | 26         |                      | 0.5                   | $>2.0 \times 10^2$    | 304                  | –                         |
|         |                                    | September | 29         |                      | 0.8                   | $4.6 \times 10^2$     | 319                  | – <sup>c</sup>            |
| B12     | Distribution system point of entry | January   | NT         | NT                   |                       | NT                    | NT                   | NT                        |
|         |                                    | May       | 21         |                      | 4.0                   | $5.9 \times 10$       | 138                  | –                         |
|         |                                    | September | 30         |                      | 4.2                   | $7.0 \times 10^1$     | 100                  | –                         |

NT, not tested.

<sup>a</sup>Amebic growth observed on culture plate, but post-culture PCR negative for *N. fowleri*.<sup>b</sup>Pre-culture PCR was positive and amebic growth observed on culture plate, but post-culture PCR negative. *N. fowleri* presence was confirmed by sequencing pre-culture DNA.<sup>c</sup>Pre-culture PCR was positive, but no amebic growth observed on culture plate. *N. fowleri* presence was confirmed by sequencing pre-culture DNA.

average concentration over time. Concentrations of HPC also increased throughout the year. HPC is an indicator of bacterial regrowth within a distribution system and is generally considered a good indicator of biofilm growth (Robertson & Brooks 2003). *N. fowleri* readily attaches to

and persists in biofilms (Biyela et al. 2012; Goudot et al. 2012) which increases the disinfectant residual or contact time required for sufficient inactivation (Miller et al. 2015). Thus, an increase in HPC over time is indicative of conditions within the distribution system that are favorable for



**Table 3** | Measured water quality parameters, heterotrophic plate count (HPC), and *N. fowleri* detections for DeSoto parish system water samples collected after chlorine conversion, January–September 2014

| Site ID | Location                           | Month     | Temp. (°C) | Free chlorine (mg/L) | Total chlorine (mg/L) | HPC (CFU/mL)          | Volume collected (L) | <i>N. fowleri</i> culture |
|---------|------------------------------------|-----------|------------|----------------------|-----------------------|-----------------------|----------------------|---------------------------|
| D1      | Point of collection sample tap     | January   | 12         | 3.7                  | 0.98                  | $<1.0 \times 10^{-2}$ | 382                  | –                         |
|         |                                    | May       | 23         | 2.4                  |                       | $1.0 \times 10$       | 739                  | –                         |
|         |                                    | September | 26         |                      |                       | $2.8 \times 10^1$     | 738                  | –                         |
| D2      | Flush hydrant                      | January   | 13         | 4.1                  | 1.2                   | $5.0 \times 10^{-2}$  | 285                  | –                         |
|         |                                    | May       | 21         | 0.06                 |                       | $>1.0 \times 10^1$    | 776                  | –                         |
|         |                                    | September | 25         |                      |                       | $1.9 \times 10^1$     | 776                  | –                         |
| D3      | Flush hydrant                      | January   | 13         | 2.2                  | 1.3                   | $5.0 \times 10^{-2}$  | 229                  | –                         |
|         |                                    | May       | 23         | 0.91                 |                       | $1.3 \times 10^1$     | 684                  | –                         |
|         |                                    | September | 27         |                      |                       | $1.6 \times 10^1$     | 640                  | –                         |
| D4      | Flush hydrant                      | January   | 13         | 5.4                  | 1.3                   | $1.0 \times 10^{-2}$  | 201                  | –                         |
|         |                                    | May       | 22         | 1.4                  |                       | $1.0 \times 10$       | 232                  | –                         |
|         |                                    | September | 27         |                      |                       | $6.2 \times 10^2$     | 231                  | –                         |
| D5      | Point of collection sample tap     | January   | 11         | 4.2                  | 0.90                  | $1.9 \times 10^{-1}$  | 300                  | –                         |
|         |                                    | May       | 22         | 0.3                  |                       | $2.8 \times 10$       | 247                  | –                         |
|         |                                    | September | 28         |                      |                       | $1.8 \times 10^2$     | 246                  | –                         |
| D6      | Fire hydrant                       | January   | 10         | 1.3                  | 0.90                  | $2.6 \times 10$       | 221                  | –                         |
|         |                                    | May       | 23         | 5.5                  |                       | $1.3 \times 10$       | 218                  | –                         |
|         |                                    | September | 26         |                      |                       | $5.1 \times 10^1$     | 204                  | –                         |
| D7      | Fire hydrant                       | January   | 8.8        | 6.5                  | 1.6                   | $8.0 \times 10^{-2}$  | 225                  | –                         |
|         |                                    | May       | 22         | 2.9                  |                       | $1.0 \times 10^{-1}$  | 416                  | –                         |
|         |                                    | September | 26         |                      |                       | $4.9 \times 10^1$     | 461                  | –                         |
| D8      | Flush hydrant                      | January   | 8.9        | 5.8                  | 0.63                  | $<1.0 \times 10^{-2}$ | 446                  | –                         |
|         |                                    | May       | 21         | 2.4                  |                       | $7.5 \times 10^2$     | 598                  | –                         |
|         |                                    | September | 25         |                      |                       | $6.0 \times 10^1$     | 598                  | –                         |
| D9      | Point of collection sample tap     | January   | 14         | 3.5                  | 1.2                   | $5.0 \times 10^{-2}$  | 159                  | –                         |
|         |                                    | May       | 22         | 1.2                  |                       | $3.6 \times 10$       | 106                  | –                         |
|         |                                    | September | 27         |                      |                       | $6.1 \times 10^2$     | 106                  | –                         |
| D10     | Fire hydrant                       | May       | 21         | 8.7                  | 2.8                   | $<1.0 \times 10^{-1}$ | 565                  | –                         |
|         |                                    | September | 26         |                      |                       | $1.0 \times 10^2$     | 573                  | –                         |
| D11     | Flush hydrant                      | January   | 10         | 2.0                  |                       | $<1.0 \times 10^{-2}$ | 252                  | –                         |
| D12     | Distribution system point of entry | January   | NT         | NT                   | NT                    | NT                    |                      | NT                        |
|         |                                    | May       | 23         | 4.8                  |                       | $<1.0 \times 10^{-1}$ | 106                  | –                         |
|         |                                    | September | 26         |                      | 6.8                   | $<1.0 \times 10$      | 106                  | –                         |

NT, not tested.

biofilm growth and persistence and possibly the presence of *N. fowleri*. A study conducted in 1984 found that *N. fowleri* presence in drinking water distribution systems was positively associated with water temperature and colony counts at 35 °C (analogous to HPC) and negatively associated with chlorine residual (Esterman et al. 1984). More recent work by Miller et al. showed that a constant free chlorine concentration of >1 mg/L both removed and prevented recolonization of *N. fowleri* in bulk water and biofilm (Miller et al. 2017). Detection of non-viable *N. fowleri*

in the St. Bernard system in September points to distribution system conditions that appeared adequate for controlling *N. fowleri*. However, concurrent detection of culturable thermophilic amebas may also be indicative of favorable conditions for *N. fowleri* survival. More research is needed to determine what other factors play a role in the detection of *N. fowleri* in drinking water distribution systems.

In a developed country like the United States, the majority of the population is fortunate to have safe drinking water for which the risk of acquiring enteric illness is low.

While treatment of drinking water in the United States has reduced the incidence of waterborne enteric illness since the early 1900s, other infections caused by opportunistic waterborne pathogens are increasingly reported, including *Legionella*, *Pseudomonas*, and nontuberculous mycobacteria (Falkinham et al. 2015). *N. fowleri* is also considered an opportunistic waterborne pathogen that can thrive in warm, under-treated, biofilm-rich water distribution systems. Although the number of *N. fowleri* infections reported in the United States is low (0–8 annually), the disease it causes, PAM, has a high mortality and typically affects otherwise young, healthy people. PAM cases, particularly those associated with exposure to drinking water, cause concern and a lack of trust in the safety of the water system among community members.

Because there is no guarantee that even the most vigilant drinking water system can completely eliminate *N. fowleri*, the public should take additional precautions when using tap water for nasal or sinus rinsing. Water used for nasal or sinus rinsing should undergo additional treatment at the point of use, which can include boiling for 1 min and cooling before use, filtering using a filter labeled as absolute pore size of 1 µm or smaller, disinfecting with chlorine bleach, or using water that is purchased sterile or distilled.

The focus of this study was not to compare detection methods for *N. fowleri*, but we employed both large-volume and small-volume detection methods to increase the probability of detecting viable thermophilic amebae in the distribution system. However, it is worth noting that *N. fowleri* was only detected by DEUF sampling. There were no *N. fowleri* detections in corresponding grab samples from each site in the distribution system. This indicates that *N. fowleri* concentration levels were low, and makes the case for large-volume sampling for distribution system monitoring for low-level contamination. It is not known whether higher concentrations of *N. fowleri* in water are associated with a higher risk of acquiring PAM.

The results of this investigation highlight the importance of maintaining adequate residual disinfectant levels in drinking water distribution systems. Water distribution system managers should be knowledgeable about the ecology of their systems, understand potential water quality changes when water temperatures increase, and work to eliminate

areas in which biofilm growth may be problematic and affect water quality.

## ACKNOWLEDGEMENTS

We acknowledge the following people for their contributions to this investigation and response: Jonathan Pressman, PhD, Environmental Protection Agency; Jimmy Guidry, MD, State Health Officer, Louisiana Department of Health; Raoul Ratard, MD, MPH, State Epidemiologist, Louisiana Department of Health. The findings and conclusions in this report are those of the authors and do not necessarily represent those of the Centers for Disease Control and Prevention.

## REFERENCES

- APHA/AWWA/WEF 2005 *Standard Methods for the Examination of Water and Wastewater*, 21st edn. American Public Health Association/American Water Works Association/Water Environment Federation, Washington, DC, USA.
- Biyela, P. T., Hodon, R., Brown, A., Alum, A., Abbaszadegan, M. & Rittmann, B. E. 2012 *Distribution systems as reservoirs of Naegleria fowleri and other amoebae*. *J. Am. Water Works Assoc.* **104** (1), 49–50.
- Cope, J. R. & Ali, I. K. 2016 *Primary amebic meningoencephalitis: what have we learned in the last 5 years?* *Curr. Infect. Dis. Rep.* **18** (10), 31.
- Cope, J. R., Ratard, R. C., Hill, V. R., Sokol, T., Causey, J. J., Yoder, J. S., Mirani, G., Mull, B., Mukerjee, K. A., Narayanan, J., Doucet, M., Qvarnstrom, Y., Poole, C. N., Akingbola, O. A., Ritter, J. M., Xiong, Z., Da Silva, A., Roellig, D., Van Dyke, R. B., Stern, H., Xiao, L. & Beach, M. J. 2015 *The first association of a primary amebic meningoencephalitis death with culturable Naegleria fowleri in tap water from a US treated public drinking water system*. *Clin. Infect. Dis.* **60** (8), e36–e42.
- De Jonckheere, J. F. 2002 A century of research on the amoeboflagellate genus *Naegleria*. *Acta Protozoologica* **41** (4), 309–342.
- Dorsch, M. M., Cameron, A. S. & Robinson, B. S. 1983 *The epidemiology and control of primary amoebic meningoencephalitis with particular reference to South Australia*. *Trans. R. Soc. Trop. Med. Hyg.* **77** (3), 372–377.
- Esterman, A., Roder, D. M., Cameron, A. S., Robinson, B. S., Walters, R. P., Lake, J. A. & Christy, P. E. 1984 Determinants of the microbiological characteristics of South Australian swimming pools. *Appl. Environ. Microbiol.* **47** (2), 325–328.

- Falkinham, J. O., Pruden, A. & Edwards, M. 2015 [Opportunistic premise plumbing pathogens: increasingly important pathogens in drinking water](#). *Pathogens* **4** (2), 373–386.
- Goudot, S., Herbelin, P., Mathieu, L., Soreau, S., Banas, S. & Jorand, F. 2012 [Growth dynamic of \*Naegleria fowleri\* in a microbial freshwater biofilm](#). *Water Res.* **46** (13), 3958–3966.
- Hill, V., Narayanan, J., Gallen, R., Ferdinand, K., Cromeans, T. & Vinje, J. 2015 [Development of a nucleic acid extraction procedure for simultaneous recovery of DNA and RNA from diverse microbes in water](#). *Pathogens* **4**, 335–354.
- Marciano-Cabral, F., MacLean, R., Mensah, A. & LaPat-Polasko, L. 2003 [Identification of \*Naegleria fowleri\* in domestic water sources by nested PCR](#). *Appl. Environ. Microbiol.* **69** (10), 5864–5869.
- Miller, H. C., Wylie, J., Dejean, G., Kaksonen, A. H., Sutton, D., Braun, K. & Puzon, G. J. 2015 [Reduced efficiency of chlorine disinfection of \*Naegleria fowleri\* in a drinking water distribution biofilm](#). *Environ. Sci. Technol.* **49** (18), 11125–11131.
- Miller, H. C., Morgan, M., Wylie, J., Kaksonen, A., Sutton, D., Braun, K. & Puzon, G. 2017 [Elimination of \*Naegleria fowleri\* from bulk water and biofilm in an operational drinking water distribution system](#). *Water Res.* **110**, 15–26.
- Mull, B. & Hill, V. R. 2012 [Recovery of diverse microbes in high turbidity surface water samples using dead-end ultrafiltration](#). *J. Microbiol. Methods* **91** (3), 429–433.
- Mull, B. J., Narayanan, J. & Hill, V. R. 2013 [Improved method for the detection and quantification of \*Naegleria fowleri\* in water and sediment using immunomagnetic separation and real-time PCR](#). *J. Parasitol. Res.* **2013**, 608367.
- Puzon, G., Lancaster, J., Wylie, J. & Plumb, I. 2009 [Rapid detection of \*Naegleria fowleri\* in water distribution pipeline biofilms and drinking water samples](#). *Environ. Sci. Technol.* **43** (17), 6691–6696.
- Robertson, W. & Brooks, T. 2003 The role of HPC in managing the treatment and distribution of drinking-water. In: *Heterotrophic Plate Counts and Drinking-Water Safety* (J. Bartram, J. Cotruvo, M. Exner, C. Fricker & A. Glasmacher eds). IWA Publishing, London, pp. 233–244.
- Robinson, B. & Christy, P. E. 1984 Disinfection of water for control of amoebae. *Water* **11**, 21–24.
- Smith, C. M. & Hill, V. R. 2009 [Dead-end hollow-fiber ultrafiltration for recovery of diverse microbes from water](#). *Appl. Environ. Microbiol.* **75** (16), 5284–5289.
- Visvesvara, G. S. & Balamuth, W. 1975 [Comparative studies on related free-living and pathogenic amebae with special reference to \*Acanthamoeba\*](#). *J. Protozool.* **22** (2), 245–256.
- Yoder, J. S., Eddy, B. A., Visvesvara, G. S., Capewell, L. & Beach, M. J. 2010 [The epidemiology of primary amoebic meningoencephalitis in the USA, 1962–2008](#). *Epidemiol. Infect.* **138** (7), 968–975.
- Yoder, J. S., Straif-Bourgeois, S., Roy, S. L., Moore, T. A., Visvesvara, G. S., Ratard, R. C., Hill, V. R., Wilson, J. D., Linscott, A. J., Crager, R., Kozak, N. A., Sriram, R., Narayanan, J., Mull, B., Kahler, A. M., Schneeberger, C., da Silva, A., Poudel, M., Baumgarten, K. L., Xiao, L. & Beach, M. J. 2012 [Primary amebic meningoencephalitis deaths associated with sinus irrigation using contaminated tap water](#). *Clin. Infect. Dis.* **55** (9), e79–e85.

First received 10 September 2018; accepted in revised form 25 July 2019. Available online 9 September 2019
